# Supplementary material
Source: PubMed Central journal article supplement (PMC6910230)
Supplement: NIHMS1538955-supplement-1.pdf [file NIHMS1538955-supplement-1.pdf]

## Supplemental Materials

Optimization of HIV-1 RNA quantitation in CVL: Assay optimization and validation were performed using unfractionated CVL collected from HIV-negative donors using a protocol and informed consent approved by the UNC-CH Institutional Review Board. Frozen aliquots of the CVL were thawed, spiked with a known amount of HIV-1, and then treated with a specific pre-treatment (detailed below) before testing with the Abbott RealTime HIV-1 assay. A 0.6 ml aliquot of phosphate-buffered saline (PBS) was always spiked with the same amount of HIV-1 at the same time the CVL was spiked as a control and was tested with the CVL, albeit without any pre-treatment. Briefly, the different pre-treatment procedures were: (i) CVL was pelleted after thawing (1000  $\times$ g for 5 min); (ii) CVL was treated as described for breastmilk [34] with the addition of RNA lysis buffer (Promega) and 60  $\mu$ l proteinase K (Abbott), followed by incubation at 53°C for 20 min; (iii) CVL was diluted 1:2 with normal plasma; (iv) addition of ~600 cp of the RCAS virus [35] to increase the amount of (non-HIV) viral RNA as a carrier; (v) treatment of CVL with lysis buffer and proteinase K as above plus 5 min of heating at 95°C to inactivate the proteinase K; (vi) treatment of CVL with lysis buffer as above with double the proteinase K amount; (vii) treatment of CVL with PBS and proteinase K; (viii) or addition of only proteinase K to the CVL. This last pre-treatment procedure with only proteinase K was used for the rest of the testing as follows: 0.06 ml proteinase K (Abbott) was added to 0.74 ml CVL and manually mixed by pipetting, incubated at 53°C for 20 min, vortexed briefly, and spun at 3200  $\times$ g for 5 min. The mixture was run on the Abbott m2000sp with the 0.6 ml plasma program. The small amount of dilution resulted in LLQ of 42 cp/ml.

**Validation of HIV-1 quantification in unfractionated CVL.** To ensure that the VL testing could be done successfully on unfractionated CVL from WIHS participants, unfractionated CVL from multiple uninfected donors was spiked with known levels of HIV-1 and tested on both a laboratory developed Droplet Digital PCR (ddPCR) HIV-1 assay and the Abbott RealTime HIV-1 assay. Both assays yielded less viral amplification in CVL than in plasma spiked with the same quantity of HIV-1 (data not shown). We tested the performance of the Abbott assay using pre-treatment procedures, which have been previously used successfully with other specimen types such as breastmilk and semen, to compare recovery of spiked HIV-1 in CVL to recovery of HIV-1 in PBS (all samples spiked with the same amount of HIV-1 at the same time and tested in parallel). As detailed in Supplemental Table S1, CVL was collected from 6 donors and spiked with HIV-1 at different levels from 100-500 cp/ml. CVL VL was always compared to the PBS VL obtained in the same run. HIV-1 recovery on the Abbott assay was poor under conditions of no pre-treatment and pelleting of the CVL cells and debris. Pre-treatment with Abbott Proteinase K and RNA lysis buffer with heating, a method previously successfully applied to breastmilk specimens [34] resulted in better, but inconsistent, recovery among donors. Other pre-treatments with poor and variable results included diluting with plasma, spiking with 6-fold more of a different retrovirus (RCAS) to increase the amount of viral RNA as carrier, heating to 95°C after proteinase K treatment, and doubling the amount of proteinase K. After replacing the lysis buffer with PBS during the proteinase K treatment we obtained consistent results with the 5 donors tested. We validated pre-treatment with and without PBS using a sample that previously gave inconsistent results (donor 1), and a set of samples spiked

with 12.5 to 100 cp/ml HIV-1 (Supplemental Table S1). This method of proteinase K treatment without any other additions was applied to all of the WIHS CVL samples tested in this study.
